# Supplementary material for: Formation and loss of metastable brucite: does Fe(II)-bearing brucite support microbial activity in serpentinizing ecosystems?
Source: Philos Trans A Math Phys Eng Sci. 2020 Jan 6;378(2165):20180423. doi: 10.1098/rsta.2018.0423 (PMC7015309; doi:10.1098/rsta.2018.0423)
Supplement: Supplementary Data 2 [file rsta20180423supp2.csv]

# Data for brucite Fe-content vs. Raman peak centroid calibration.
# Sample Name: Name of sample analyzed.
# Sample Type: Origin of sample. "Natural Standards" are brucite specimens procured from collections or mineral dealers. "Oman Brucite Sample" refers to brucite analyses from a thin section containing brucite prepared from a hand sample from the Oman ophiolite. "Synthetic Brucite" refers to brucite synthesized by coprecipitating Mg2+, Fe2+, and OH-.
# Centroid: centroid position in wavenumbers (1/cm) of the Raman peak near 3650, after background subtraction.
# Mg#: mole ratio of Mg/Mg+Fe, determined by electron probe microanalysis (Natural Sandards and Oman Brucite Sample) or else based on the known composition used in the synthesis reaction (Synthetic Brucite).
Sample Name	Sample Type	Centroid	Mg#
B4ExcalNY	Natural Standards	3640.084789	0.951391317
B3NMNHC1795-1	Natural Standards	3641.479669	0.977214285
B6ExcalSweden	Natural Standards	3647.842304	0.983904747
B5ExcalCA	Natural Standards	3649.919614	0.985672639
B8WardsPA	Natural Standards	3650.309187	0.9977209
B1ExcalPa	Natural Standards	3650.618983	0.998686365
B7NMNH105072	Natural Standards	3648.542757	0.999947519
OM14-06-Br3	Oman Brucite Sample	3635.884213	0.854091035
OM14-06-Br-9/10	Oman Brucite Sample	3638.355253	0.803899578
OM14-06-Br-4/5	Oman Brucite Sample	3639.549135	0.883046032
OM14-06-6/7/8	Oman Brucite Sample	3638.089744	0.876949068
OM14-06-Br12/13	Oman Brucite Sample	3634.75502	0.82345937
Synth1-Fe(OH)2	Synthetic Brucite	3579.670912	0
Synth1-1 to 1	Synthetic Brucite	3611.795095	0.5
Synth1-1 to 3	Synthetic Brucite	3624.425666	0.75
Synth1-Mg(OH)2	Synthetic Brucite	3651.28037	1
Synth2-Fe(OH)2	Synthetic Brucite	3578.020525	0
Synth2-1 to 2	Synthetic Brucite	3623.684973	0.67
Synth2-1 to 19	Synthetic Brucite	3644.538833	0.95
Synth2-1 to 9	Synthetic Brucite	3641.310901	0.9
